# Supplementary material for: Long‐Term Outcomes and Duration of Dual Antiplatelet Therapy After Coronary Intervention With Second‐Generation Drug‐Eluting Stents: The Veterans Affairs Extended DAPT Study
Source: PubMed Central journal article supplement — J Am Heart Assoc. 2023 Jan 16;12(2):e027055. doi: 10.1161/JAHA.122.027055 (PMC9939065; doi:10.1161/jaha.122.027055), 2023-01-16

# **Supplemental Material**

Table S1. ICD 9 and ICD 10 codes for comorbidities and outcomes.

| CONDITION                                                                                                                                  | ICD9-CM | ICD10-CM | ICD9-PCS | ICD10-PCS                                                                                   | CPT / HCPCS                                                                                                                                                                                 |
|--------------------------------------------------------------------------------------------------------------------------------------------|---------|----------|----------|---------------------------------------------------------------------------------------------|---------------------------------------------------------------------------------------------------------------------------------------------------------------------------------------------|
| Prior Percutaneous Coronary Intervention = prior drug-eluting stent (first or second-generation), bare metal stent, or balloon angioplasty |         |          |          |                                                                                             |                                                                                                                                                                                             |
| First-generation drug-eluting stent                                                                                                        |         |          | 36.07    | 0270346,<br>027034Z,<br>0720356,<br>027035Z,<br>0270366,<br>027036Z,<br>0270376,<br>027037Z | C1874, C1875<br>OR<br>[(G0290, G0291<br>before 2014)<br>OR<br>(C9600, C9601,<br>C9602, C9603,<br>C9604, C9605,<br>C9606, C9607,<br>C9608 from<br>2013 on)]                                  |
| Second-generation drug-eluting stent                                                                                                       |         |          | 36.07    | 0270346,<br>027034Z,<br>0720356,<br>027035Z,<br>0270366,<br>027036Z,<br>0270376,<br>027037Z | C1874, C1875<br>OR<br>[(G0290, G0291<br>before 2014)<br>OR<br>(C9600, C9601,<br>C9602, C9603,<br>C9604, C9605,<br>C9606, C9607,<br>C9608 from<br>2013 on)]                                  |
| Bare metal stent                                                                                                                           |         |          | 36.06    | 02703D6,<br>02703DZ,<br>02703E6,<br>02703EZ,<br>02703F6,<br>02703FZ,<br>02703G6,<br>02703GZ | C1876, C1877<br>OR<br>[(92980 or<br>92981 before<br>2014)<br>OR<br>(92928, 92929,<br>92933, 92934,<br>92937, 92938,<br>92941, 92943, or<br>92944 from<br>2013 on)<br>AND no DES C<br>codes] |
| PCI with balloon angioplasty                                                                                                               |         |          | 0.66     | 02703Z6,<br>02703ZZ                                                                         | 92920, 92921                                                                                                                                                                                |
| Prior coronary artery bypass surgery (CABG)                                                                                                |         |          | 36.1     | 02100A3,<br>02100A8,<br>02100A9,                                                            | 33510-33516,<br>33517-33523,                                                                                                                                                                |

|                       |                                                                                                                                                                                                                                                                                                                                                                                                                                                                                                                                                                                     |                                                                                                                                                                                                                                                                                                                                                                                                                                                                                               |                                                                                                         |                        |
|-----------------------|-------------------------------------------------------------------------------------------------------------------------------------------------------------------------------------------------------------------------------------------------------------------------------------------------------------------------------------------------------------------------------------------------------------------------------------------------------------------------------------------------------------------------------------------------------------------------------------|-----------------------------------------------------------------------------------------------------------------------------------------------------------------------------------------------------------------------------------------------------------------------------------------------------------------------------------------------------------------------------------------------------------------------------------------------------------------------------------------------|---------------------------------------------------------------------------------------------------------|------------------------|
|                       |                                                                                                                                                                                                                                                                                                                                                                                                                                                                                                                                                                                     |                                                                                                                                                                                                                                                                                                                                                                                                                                                                                               | 02100AC,<br>02100AF,<br>02100AW,<br>0210093,<br>0210098,<br>0210099,<br>021009C,<br>021009F,<br>021009W | 33530, 33533-<br>33536 |
| Stroke                | 433.01, 433.11,<br>433.21, 433.31,<br>433.81, 433.91,<br>434.01, 434.11,<br>434.91, 436                                                                                                                                                                                                                                                                                                                                                                                                                                                                                             | I63                                                                                                                                                                                                                                                                                                                                                                                                                                                                                           |                                                                                                         |                        |
| Myocardial Infarction | 410                                                                                                                                                                                                                                                                                                                                                                                                                                                                                                                                                                                 | I21                                                                                                                                                                                                                                                                                                                                                                                                                                                                                           |                                                                                                         |                        |
| Major Bleed           | 379.23, 423.0,<br>430, 431, 432,<br>568.81, 719.1<br>456.0, 459.0,<br>530.21, 530.7,<br>530.82, 531.00,<br>531.20, 531.40,<br>531.60, 531.01,<br>531.21, 531.41,<br>531.61, 532.00,<br>532.20, 532.40,<br>532.60, 532.01,<br>532.21, 532.41,<br>532.61, 533.00,<br>533.20, 533.40,<br>533.60, 533.01,<br>533.21, 533.41,<br>533.61, 534.00,<br>534.20, 534.40,<br>534.60, 534.01,<br>534.21, 534.41,<br>534.61, 535.01,<br>535.11, 535.21,<br>535.31, 535.41,<br>535.51, 535.61,<br>535.71, 537.83,<br>562.12, 562.13,<br>569.3, 569.85,<br>578.0, 578.1,<br>578.9, 784.8,<br>786.3 | H43.1, I31.2,<br>I60, I61, I62,<br>K66.1, M25.0,<br>K22.11, K22.6 ,<br>K25.0, K25.2,<br>K25.4, K25.6,<br>K26.0, K26.2,<br>K26.4, K26.6,<br>K27.0, K27.2,<br>K27.4, K27.6,<br>K28.0, K28.2,<br>K28.4, K28.6,<br>K29.01, K29.21,<br>K29.31, K29.41,<br>K29.51, K29.61,<br>K29.71, K29.81,<br>K29.91,<br>K31.811,<br>K55.21, K57.01,<br>K57.13, K57.21,<br>K57.31, K57.33,<br>K57.41, K57.51,<br>K57.53, K57.81,<br>K57.91, K57.93,<br>K62.5, K92.1,<br>K92.2, R04.1,<br>R04.8, R04.89,<br>R04.9 |                                                                                                         |                        |

|                                              |                         |                                                                                    |                                                                                                                                                                    |
|----------------------------------------------|-------------------------|------------------------------------------------------------------------------------|--------------------------------------------------------------------------------------------------------------------------------------------------------------------|
| Moderate Bleed                               | 596.7, 599.7, 784.7     | 04.0, R31                                                                          |                                                                                                                                                                    |
| Cardiac Death                                |                         | I20-I25, I30-I52, R99                                                              |                                                                                                                                                                    |
| Vascular Death                               |                         | I26-I28, I60-I89                                                                   |                                                                                                                                                                    |
| Non-Cardiovascular Death                     |                         | All not specified in cardiac or vascular                                           |                                                                                                                                                                    |
| Chronic kidney disease                       | 585                     | N18                                                                                |                                                                                                                                                                    |
| Diabetes                                     | 250                     | E08, E09, E10, E11, E13                                                            |                                                                                                                                                                    |
| Peripheral Artery Disease                    | 440.2                   | I70.2, I70.3, I70.4, I70.5, I70.6, I70.6, I70.92                                   |                                                                                                                                                                    |
| Hypertension                                 | 401                     | I10, I15, I16                                                                      |                                                                                                                                                                    |
| Chronic Obstructive Pulmonary Disease (COPD) | 490, 491, 492, 494, 496 | J41, J42, J43, J44                                                                 |                                                                                                                                                                    |
| Congestive Heart Failure                     | 428                     | I50                                                                                |                                                                                                                                                                    |
| Angina                                       | 413                     | I20.1, I20.8, I20.9, I25.11, I25.70, I2571, I25.72, I25.73, I25.75, I25.76, I25.79 |                                                                                                                                                                    |
| Cancer                                       | 140 - 209.3, 209.7      | C00-C26, C30-C34, C37-C41, C43-C58, C60-C85, C7A, C88, C90-C96, D45                |                                                                                                                                                                    |
| Chemotherapy                                 | V58.1                   | Z51.11, Z51.12                                                                     | 964, 96535, 96538, GA0498, J9, Q0083, Q0084, Q0085, 4180F, 9955, C8953, C8954, C8955, G0070, G0355, G0359, G0361, G8372, G8373, G9829, J7150, Q0083, Q0084, Q0085, |

|                            |                       |                                                   |                                                                                                                                                                                                                                                                                                                                                                                                                                                            |
|----------------------------|-----------------------|---------------------------------------------------|------------------------------------------------------------------------------------------------------------------------------------------------------------------------------------------------------------------------------------------------------------------------------------------------------------------------------------------------------------------------------------------------------------------------------------------------------------|
|                            |                       |                                                   | S9329, S9330,<br>Z0904                                                                                                                                                                                                                                                                                                                                                                                                                                     |
| Radiotherapy               | V58.0                 | Z51.0,                                            | 77371, 77372,<br>77373, 77381,<br>77385, 77386,<br>7740, 77410,<br>77411, 77412,<br>77413, 77414,<br>77416, 77417,<br>77418, 77420,<br>77422, 77423<br>,77424, 77425,<br>77427, 7743,<br>7746, 77499,<br>775, 77761,<br>77762, 77763,<br>77771, 77772,<br>77773, G0174,<br>G0256, G0261,<br>G6003, G6004,<br>G6005, G6006,<br>G6007, G6008,<br>G6009, G6010,<br>G6011, G6012,<br>G6013, G6014,<br>G6015, G6016,<br>0082T, 4165F,<br>4818F, 4812F,<br>Z0903 |
| Anemia                     | 281, 283, 284,<br>285 | D51, D52, D53,<br>D59, D60, D61,<br>D62, D63, D64 |                                                                                                                                                                                                                                                                                                                                                                                                                                                            |
| Acute Coronary<br>Syndrome | 410, 411.1, 411.8     | I21, I20.0                                        |                                                                                                                                                                                                                                                                                                                                                                                                                                                            |

Table S2. Variables entered & selected by regression for the propensity to stop DAPT.

2.1 Variables Entered Into Models for Each Time Period

Sex,  
Age at start month,  
Current Smoker at index PCI  
Acute Coronary Syndrome (7-days before to 14-days after index PCI)  
Acute Coronary Syndrome between index PCI and start of time period  
Major Bleed prior to index PCI,  
Major Bleed between index PCI and start of time period  
Comorbidities from 5 years before index PCI to start of time period  
    Anemia  
    Angina  
    Cancer and Chemotherapy or Radiation Therapy  
    Congestive Heart Failure  
    Chronic Kidney Disease  
    Chronic Obstructive Pulmonary Disease  
    Diabetes Mellitus requiring Insulin  
    Diabetes Mellitus requiring Oral Medications  
    Hypertension  
    Peripheral Artery Disease  
Medication use in the month prior to the start of the time period  
    Angiotensin Converting Enzyme Inhibitor  
    Antiarrhythmic agent  
    Anticoagulant  
    Statin  
    Antilipemic Drug (other than statin)  
    Angiotensin Receptor Blocker  
    Calcium Channel Blocker  
    Digitalis  
    Diuretic  
    Glucocorticoid  
    Non-Steroidal Anti-inflammatory agent (NSAID)  
    Proton Pump Inhibitor  
Average blood chemistry value (month prior to start of time period or most recent value if no measure in a given month)  
    Estimated Glomerular Filtration Rate  
    Glucose  
    Hemoglobin  
    Total Cholesterol  
Procedural Variables  
    Stented artery  
    Fluoroscopy time  
    Contrast volume  
    Number of stents  
    Platelet count

## 2.2 Variables Retained by Models

| Time Period  | Prediction Variables Retained                                                                                                                                                                                                                               |
|--------------|-------------------------------------------------------------------------------------------------------------------------------------------------------------------------------------------------------------------------------------------------------------|
| 1-5 months   | Age, acute coronary syndrome at index PCI, congestive heart failure, calcium channel blocker, proton pump inhibitor, estimated glomerular filtration rate (eGFR), glucose, hemoglobin, total cholesterol, platelet count, fluoroscopy time, contrast volume |
| 6-9 months   | Age, statin therapy, beta-blocker, glucose, hemoglobin, total cholesterol, platelet count, contrast volume                                                                                                                                                  |
| 10-12 months | Age, eGFR, glucose, total cholesterol, fluoroscopy time, contrast volume                                                                                                                                                                                    |
| 13-18 months | Age, acute coronary syndrome between index PCI and 13 months after PCI, angina, beta-blocker, eGFR, glucose, hemoglobin, total cholesterol, platelet count, fluoroscopy time, contrast volume                                                               |

Table S3. Univariable Comparison of Excluded versus Included Subjects.

|                          | <b>Excluded</b> | <b>Included</b> |                |
|--------------------------|-----------------|-----------------|----------------|
| <b>Risk factor</b>       | <b>n=4,640</b>  | <b>n=40,882</b> | <b>p-value</b> |
| Age, mean(SD)            | 66.3 (9.2)      | 65.2 (8.8)      | <.0001         |
| Male, n(%)               | 4,574 (98.6)    | 40,211 (98.4)   | 0.2629         |
| Anemia, n(%)             | 1,326 (28.6)    | 7,924 (19.4)    | <.0001         |
| Angina, n(%)             | 1,857 (40.0)    | 12,832 (31.4)   | <.0001         |
| CHF, n(%)                | 1,645 (35.5)    | 9,621 (23.5)    | <.0001         |
| CKD, n(%)                | 1,186 (25.6)    | 7,113 (17.4)    | <.0001         |
| COPD, n(%)               | 1,679 (36.2)    | 12,491 (30.6)   | <.0001         |
| Diabetes + Insulin, n(%) | 2,047 (44.1)    | 14,398 (35.2)   | <.0001         |
| Diabetes + OralHyp, n(%) | 2,136 (46.0)    | 16,751 (41.0)   | <.0001         |
| Htn, n(%)                | 4,298 (92.6)    | 36,715 (89.8)   | <.0001         |
| PAD, n(%)                | 548 (11.8)      | 2,587 (6.3)     | <.0001         |
| Cancer+Chem/Rad, n(%)    | 225 (4.8)       | 1,623 (4.0)     | 0.0040         |
| Prior MI, n(%)           | 914 (19.7)      | 3,034 (7.4)     | <.0001         |
| Prior CABG, n(%)         | 167 (3.6)       | 1,415 (3.5)     | 0.6268         |



Table S4. Sensitivity analysis restricting outcomes to within 2 years of each time period.

**Short-Term Outcomes within 2 Years**

**Death**

| Start Month | End Date          | DAPT DC<br>Events/<br>1,000<br>PM | On DAPT<br>Events/<br>1,000<br>PM | Crude           |                         |      | IPTW Adjusted   |                         |      |
|-------------|-------------------|-----------------------------------|-----------------------------------|-----------------|-------------------------|------|-----------------|-------------------------|------|
|             |                   |                                   |                                   | Hazard<br>Ratio | 95% Confidence<br>Limit |      | Hazard<br>Ratio | 95% Confidence<br>Limit |      |
| 1-5         | Start Month + 24m | 7.65                              | 3.49                              | 2.71            | 2.37                    | 3.09 | 2.54            | 2.22                    | 2.90 |
| 6-9         | Start Month + 24m | 8.61                              | 3.35                              | 2.95            | 2.61                    | 3.32 | 2.86            | 2.53                    | 3.23 |
| 10-12       | Start Month + 24m | 3.13                              | 3.41                              | 1.02            | 0.93                    | 1.12 | 1.07            | 0.97                    | 1.17 |
| 13-18       | Start Month + 24m | 3.28                              | 4.00                              | 1.01            | 0.94                    | 1.08 | 1.07            | 0.99                    | 1.15 |

**Myocardial Infarction**

| Start Month | End Date          | DAPT DC<br>Events/<br>1,000<br>PM | On DAPT<br>Events/<br>1,000<br>PM | Crude           |                         |      | IPTW Adjusted   |                         |      |
|-------------|-------------------|-----------------------------------|-----------------------------------|-----------------|-------------------------|------|-----------------|-------------------------|------|
|             |                   |                                   |                                   | Hazard<br>Ratio | 95% Confidence<br>Limit |      | Hazard<br>Ratio | 95% Confidence<br>Limit |      |
| 1-5         | Start Month + 24m | 2.73                              | 4.26                              | 0.82            | 0.66                    | 1.03 | 0.80            | 0.64                    | 1.00 |
| 6-9         | Start Month + 24m | 2.89                              | 3.07                              | 1.07            | 0.87                    | 1.32 | 1.04            | 0.84                    | 1.29 |
| 10-12       | Start Month + 24m | 1.62                              | 2.95                              | 0.64            | 0.56                    | 0.73 | 0.65            | 0.57                    | 0.74 |
| 13-18       | Start Month + 24m | 2.15                              | 3.47                              | 0.84            | 0.76                    | 0.92 | 0.87            | 0.79                    | 0.95 |

**Major Bleeding**

| Start Month | End Date          | DAPT DC<br>Events/<br>1,000<br>PM | On DAPT<br>Events/<br>1,000<br>PM | Crude           |                         |      | IPTW Adjusted   |                         |      |
|-------------|-------------------|-----------------------------------|-----------------------------------|-----------------|-------------------------|------|-----------------|-------------------------|------|
|             |                   |                                   |                                   | Hazard<br>Ratio | 95% Confidence<br>Limit |      | Hazard<br>Ratio | 95% Confidence<br>Limit |      |
| 1-5         | Start Month + 24m | 2.38                              | 2.48                              | 1.12            | 0.88                    | 1.43 | 1.07            | 0.84                    | 1.36 |
| 6-9         | Start Month + 24m | 2.42                              | 1.92                              | 1.41            | 1.12                    | 1.76 | 1.32            | 1.05                    | 1.67 |
| 10-12       | Start Month + 24m | 1.33                              | 1.77                              | 0.87            | 0.75                    | 1.00 | 0.89            | 0.77                    | 1.03 |
| 13-18       | Start Month + 24m | 1.28                              | 2.10                              | 0.80            | 0.71                    | 0.90 | 0.83            | 0.74                    | 0.94 |

**Cardiac Death**

| Start Month | End Date          | DAPT DC<br>Events/<br>1,000<br>PM | On DAPT<br>Events/<br>1,000<br>PM | Crude           |                         |      | IPTW Adjusted   |                         |      |
|-------------|-------------------|-----------------------------------|-----------------------------------|-----------------|-------------------------|------|-----------------|-------------------------|------|
|             |                   |                                   |                                   | Hazard<br>Ratio | 95% Confidence<br>Limit |      | Hazard<br>Ratio | 95% Confidence<br>Limit |      |
| 1-5         | Start Month + 24m | 3.18                              | 1.49                              | 2.60            | 2.12                    | 3.19 | 2.54            | 2.06                    | 3.12 |
| 6-9         | Start Month + 24m | 2.78                              | 1.41                              | 2.26            | 1.83                    | 2.79 | 2.23            | 1.80                    | 2.75 |
| 10-12       | Start Month + 24m | 1.04                              | 1.41                              | 0.84            | 0.71                    | 0.99 | 0.88            | 0.74                    | 1.03 |
| 13-18       | Start Month + 24m | 1.11                              | 1.72                              | 0.82            | 0.72                    | 0.92 | 0.87            | 0.76                    | 0.98 |

**Vascular Death**

| Start Month | End Date          | DAPT DC<br>Events/<br>1,000<br>PM | On DAPT<br>Events/<br>1,000<br>PM | Crude           |                         |      | IPTW Adjusted   |                         |      |
|-------------|-------------------|-----------------------------------|-----------------------------------|-----------------|-------------------------|------|-----------------|-------------------------|------|
|             |                   |                                   |                                   | Hazard<br>Ratio | 95% Confidence<br>Limit |      | Hazard<br>Ratio | 95% Confidence<br>Limit |      |
| 1-5         | Start Month + 24m | 0.38                              | 0.16                              | 3.03            | 1.71                    | 5.36 | 2.99            | 1.68                    | 5.33 |
| 6-9         | Start Month + 24m | 0.70                              | 0.13                              | 5.33            | 3.53                    | 8.04 | 5.14            | 3.37                    | 7.84 |
| 10-12       | Start Month + 24m | 0.15                              | 0.13                              | 1.26            | 0.83                    | 1.91 | 1.30            | 0.86                    | 1.98 |
| 13-18       | Start Month + 24m | 0.15                              | 0.14                              | 1.21            | 0.85                    | 1.74 | 1.34            | 0.93                    | 1.93 |

**Non-Cardiovascular Death**

| Start Month | End Date          | DAPT DC<br>Events/<br>1,000<br>PM | On DAPT<br>Events/<br>1,000<br>PM | Crude           |                         |      | IPTW Adjusted   |                         |      |
|-------------|-------------------|-----------------------------------|-----------------------------------|-----------------|-------------------------|------|-----------------|-------------------------|------|
|             |                   |                                   |                                   | Hazard<br>Ratio | 95% Confidence<br>Limit |      | Hazard<br>Ratio | 95% Confidence<br>Limit |      |
| 1-5         | Start Month + 24m | 4.16                              | 1.91                              | 2.71            | 2.27                    | 3.24 | 2.44            | 2.03                    | 2.92 |
| 6-9         | Start Month + 24m | 5.25                              | 1.86                              | 3.26            | 2.80                    | 3.81 | 3.14            | 2.68                    | 3.68 |
| 10-12       | Start Month + 24m | 1.93                              | 1.88                              | 1.13            | 1.00                    | 1.28 | 1.18            | 1.04                    | 1.33 |
| 13-18       | Start Month + 24m | 1.99                              | 2.01                              | 1.17            | 1.06                    | 1.28 | 1.23            | 1.11                    | 1.35 |

Table S5. Interaction models assessing DAPT discontinuation within subgroups of patients with PCI for acute coronary syndromes.

Interaction of ACS at Index (7-days before to 14-days after index)

Death

| Start Months | Index ACS                  |                            |                            | No Index ACS               |                            |                            | Interaction Term p-value |
|--------------|----------------------------|----------------------------|----------------------------|----------------------------|----------------------------|----------------------------|--------------------------|
|              | DAPT DC # Events/ 1,000 PM | On DAPT # Events/ 1,000 PM | IPTW Hazard Ratio (95% CL) | DAPT DC # Events/ 1,000 PM | On DAPT # Events/ 1,000 PM | IPTW Hazard Ratio (95% CL) |                          |
| 1-5          | 6.864                      | 3.690                      | 1.96 (1.70, 2.28)          | 6.725                      | 3.398                      | 2.15 (1.79, 2.58)          | 0.7145                   |
| 6-9          | 7.467                      | 3.626                      | 2.17 (1.90, 2.48)          | 7.194                      | 3.360                      | 2.25 (1.91, 2.65)          | 0.9426                   |
| 10-12        | 3.207                      | 3.733                      | 0.95 (0.87, 1.03)          | 2.978                      | 3.533                      | 0.92 (0.84, 1.01)          | 0.6808                   |
| 13-18        | 3.358                      | 4.184                      | 0.92 (0.86, 0.98)          | 3.487                      | 3.738                      | 1.03 (0.96, 1.11)          | 0.0282                   |

Major Bleed

| Start Months | Index ACS                  |                            |                            | No Index ACS               |                            |                            | Interaction Term p-value |
|--------------|----------------------------|----------------------------|----------------------------|----------------------------|----------------------------|----------------------------|--------------------------|
|              | DAPT DC # Events/ 1,000 PM | On DAPT # Events/ 1,000 PM | IPTW Hazard Ratio (95% CL) | DAPT DC # Events/ 1,000 PM | On DAPT # Events/ 1,000 PM | IPTW Hazard Ratio (95% CL) |                          |
| 1-5          | 1.868                      | 1.867                      | 0.93 (0.71, 1.22)          | 2.309                      | 1.490                      | 1.50 (1.10, 2.05)          | 0.0236                   |
| 6-9          | 1.815                      | 1.631                      | 1.04 (0.80, 1.36)          | 1.929                      | 1.301                      | 1.38 (1.02, 1.87)          | 0.2234                   |
| 10-12        | 1.136                      | 1.605                      | 0.79 (0.68, 0.91)          | 1.007                      | 1.284                      | 0.86 (0.74, 1.01)          | 0.4069                   |
| 13-18        | 1.149                      | 1.850                      | 0.76 (0.68, 0.85)          | 1.110                      | 1.390                      | 0.91 (0.80, 1.04)          | 0.0392                   |

MI

| Start Months | Index ACS                  |                            |                            | No Index ACS               |                            |                            | Interaction Term p-value |
|--------------|----------------------------|----------------------------|----------------------------|----------------------------|----------------------------|----------------------------|--------------------------|
|              | DAPT DC # Events/ 1,000 PM | On DAPT # Events/ 1,000 PM | IPTW Hazard Ratio (95% CL) | DAPT DC # Events/ 1,000 PM | On DAPT # Events/ 1,000 PM | IPTW Hazard Ratio (95% CL) |                          |
| 1-5          | 3.256                      | 3.655                      | 0.90 (0.73, 1.10)          | 2.218                      | 1.913                      | 1.19 (0.87, 1.62)          | 0.4614                   |
| 6-9          | 2.931                      | 2.864                      | 0.99 (0.80, 1.22)          | 1.984                      | 1.849                      | 1.10 (0.82, 1.47)          | 0.7023                   |
| 10-12        | 1.924                      | 2.838                      | 0.76 (0.68, 0.85)          | 1.282                      | 1.890                      | 0.75 (0.66, 0.86)          | 0.9640                   |
| 13-18        | 2.197                      | 3.220                      | 0.83 (0.76, 0.90)          | 1.555                      | 2.076                      | 0.88 (0.79, 0.98)          | 0.4104                   |

Table S6. Interaction models assessing DAPT discontinuation within subgroups of patients according to use of anticoagulants.

Effect Modification: Anticoagulation

Death

| Start Months | Anticoagulant              |                            |                       | No Anticoagulant           |                            |                       | Interaction Term p-value |
|--------------|----------------------------|----------------------------|-----------------------|----------------------------|----------------------------|-----------------------|--------------------------|
|              | DAPT DC # Events/ 1,000 PM | On DAPT # Events/ 1,000 PM | Hazard Ratio (95% CL) | DAPT DC # Events/ 1,000 PM | On DAPT # Events/ 1,000 PM | Hazard Ratio (95% CL) |                          |
| 1-5          | 8.921                      | 4.574                      | 2.13(1.60, 2.83)      | 4.175                      | 2.573                      | 2.04 (1.77, 2.34)     | 0.0121                   |
| 6-9          | 15.627                     | 7.136                      | 1.74 (1.37, 2.20)     | 5.372                      | 2.935                      | 2.26 (2.00, 2.55)     | 0.2485                   |
| 10-12        | 7.354                      | 7.683                      | 1.00 (0.85, 1.17)     | 2.533                      | 3.121                      | 0.87 (0.80, 0.94)     | 0.0006                   |
| 13-18        | 7.279                      | 7.352                      | 1.00 (0.88, 1.14)     | 2.849                      | 3.376                      | 0.93(0.87, 0.99)      | 0.0586                   |

Major Bleed

| Start Months | Anticoagulant              |                            |                       | No Anticoagulant           |                            |                       | Interaction Term p-value |
|--------------|----------------------------|----------------------------|-----------------------|----------------------------|----------------------------|-----------------------|--------------------------|
|              | DAPT DC # Events/ 1,000 PM | On DAPT # Events/ 1,000 PM | Hazard Ratio (95% CL) | DAPT DC # Events/ 1,000 PM | On DAPT # Events/ 1,000 PM | Hazard Ratio (95% CL) |                          |
| 1-5          | 2.819                      | 2.310                      | 1.45 (0.97, 2.17)     | 1.296                      | 1.287                      | 1.06 (0.82, 1.38)     | 0.0418                   |
| 6-9          | 3.556                      | 3.357                      | 0.84 (0.53, 1.32)     | 1.574                      | 1.301                      | 1.26 (1.00, 1.59)     | 0.8957                   |
| 10-12        | 2.804                      | 3.266                      | 0.88 (0.68, 1.14)     | 0.944                      | 1.338                      | 0.75 (0.66, 0.86)     | 0.1970                   |
| 13-18        | 2.865                      | 3.306                      | 1.02 (0.83, 1.26)     | 0.980                      | 1.474                      | 0.74 (0.67, 0.82)     | 0.0011                   |

MI

| Start Months | Anticoagulant              |                            |                       | No Anticoagulant           |                            |                       | Interaction Term p-value |
|--------------|----------------------------|----------------------------|-----------------------|----------------------------|----------------------------|-----------------------|--------------------------|
|              | DAPT DC # Events/ 1,000 PM | On DAPT # Events/ 1,000 PM | Hazard Ratio (95% CL) | DAPT DC # Events/ 1,000 PM | On DAPT # Events/ 1,000 PM | Hazard Ratio (95% CL) |                          |
| 1-5          | 3.637                      | 3.788                      | 1.27 (0.82, 1.97)     | 2.440                      | 2.269                      | 1.05 (0.87, 1.28)     | 0.5269                   |
| 6-9          | 3.510                      | 3.911                      | 0.82 (0.51, 1.31)     | 2.530                      | 2.298                      | 1.10 (0.90, 1.33)     | 0.6034                   |
| 10-12        | 2.897                      | 4.104                      | 0.88 (0.68, 1.14)     | 1.546                      | 2.333                      | 0.74 (0.67, 0.81)     | 0.0824                   |
| 13-18        | 2.888                      | 4.379                      | 0.93 (0.76, 1.15)     | 1.903                      | 2.559                      | 0.83 (0.77, 0.90)     | 0.6123                   |

Figure S1. Event curves in subgroups of clopidogrel versus ticagrelor or prasugrel.

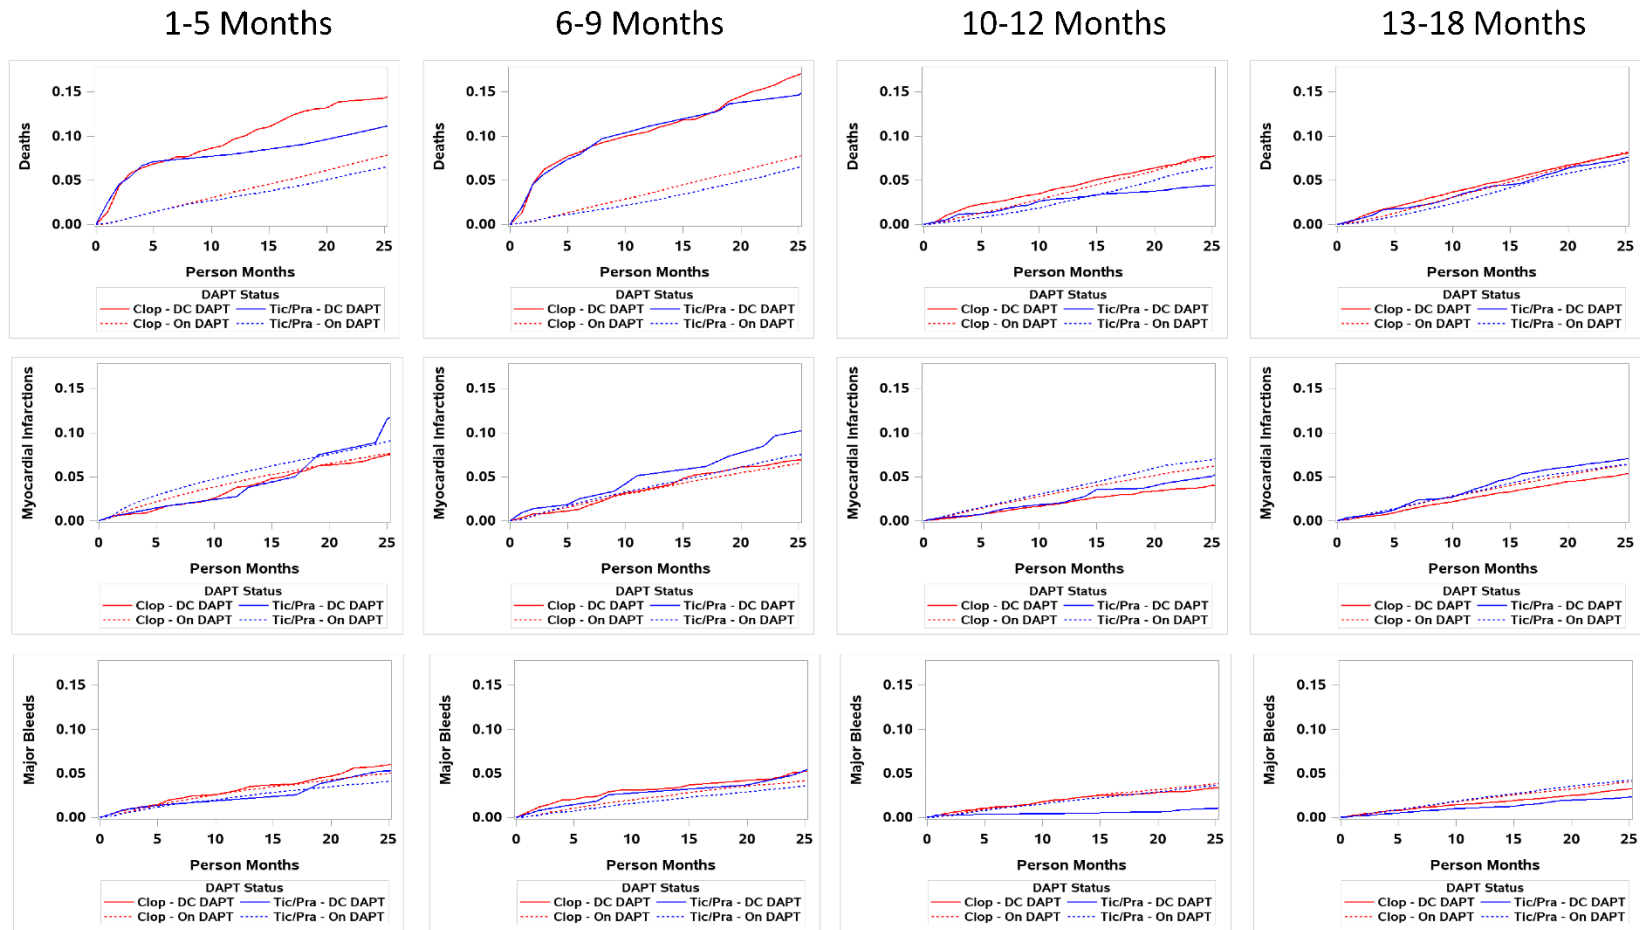

Supplement: JAH3-12-e027055-s001.pdf [file JAH3-12-e027055-s001.pdf]
